# Supplementary material for: Design of melamine/ZIF-67-derivatives based Z-shaped metamaterial for ultra-broadband microwave absorption
Source: Royal Society of Chemistry journal article supplement (doi:10.1039/d5nr05203c), 2026-01-01
Supplement: d5nr05203c1.pdf [file d5nr05203c1.pdf]

## Supporting Information

### **Melamine/ZIF-67-derivatives based Z-shaped Metamaterial for Ultra-broadband Microwave Absorber: Design from Microscopic Dielectric-Magnetic Coupling Effect to Macroscopic Artificial Engineered Structure**

Xiaochi Lu <sup>\*a</sup>, Zhuokang Zhou <sup>a</sup>, Xinchun Li <sup>a</sup>, Yu Chen <sup>c</sup>, Litao Lin <sup>c</sup>, Wenquan Zhong <sup>a</sup>, Wenyu Cao <sup>a</sup>,

Zhuangzhi Liu <sup>a</sup>, Qijun Xian <sup>a</sup>, Ziyang Dai <sup>b</sup>, Panpan Zhou <sup>d</sup>, Bin Quan <sup>\*c</sup>

---

<sup>a</sup> *College of Electronic and Optical Engineering & College of Flexible Electronics (Future Technology), Nanjing University of Posts and Telecommunications, Nanjing 210023, China.*

<sup>b</sup> *School of Materials Science and Engineering, Yancheng Institute of Technology, Yancheng, 224051, China*

<sup>c</sup> *Jiangsu Key Laboratory of New Energy Devices & Interface Science, School of Chemistry and Materials Science, Nanjing University of Information Science & Technology, Nanjing 210044, China*

<sup>d</sup> *School of Electronic and Information Engineering, Suzhou University of Technology, Changshu, 215500, China*

(\*) corresponding author: [xiaochilu@njupt.edu.cn](mailto:xiaochilu@njupt.edu.cn) (Xiaochi Lu), [binquan@nuist.edu.cn](mailto:binquan@nuist.edu.cn) (Bin Quan)

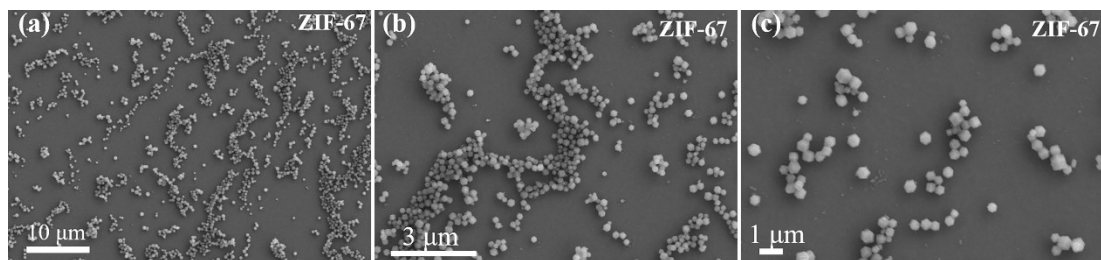

**Fig. S1** SEM images of ZIF-67 particles.

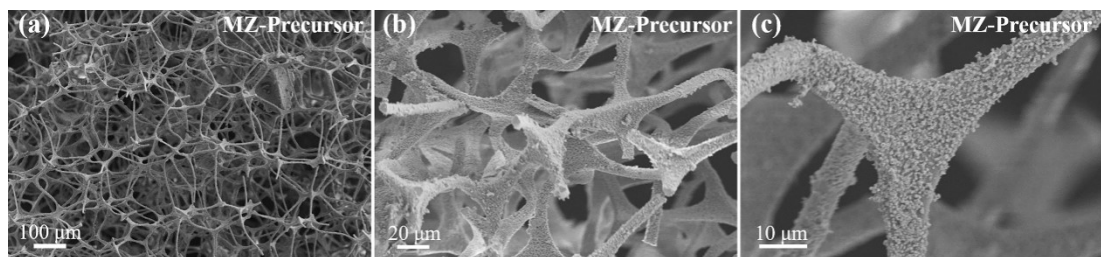

**Fig. S2** SEM images of ZIF-67 particles attached to melamine foam skeleton.

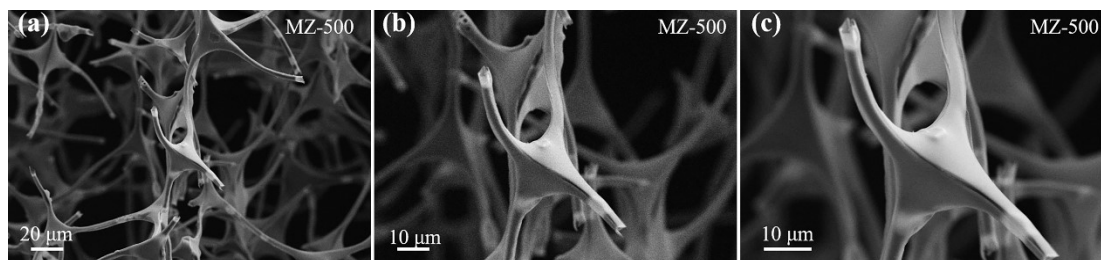

**Fig. S3** SEM images of composite material with ZIF-67 particles attached to melamine foam framework after 500 °C heat treatment.

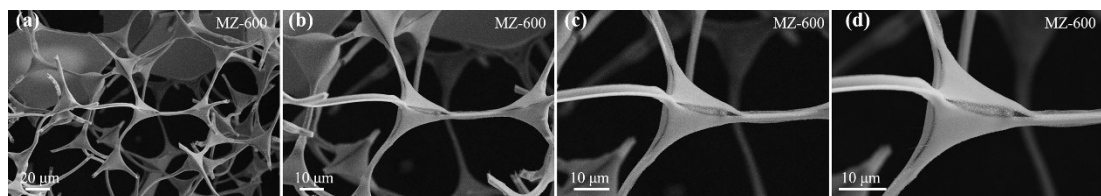

**Fig. S4** SEM images of composite material with ZIF-67 particles attached to melamine foam skeleton after 600 °C heat treatment.

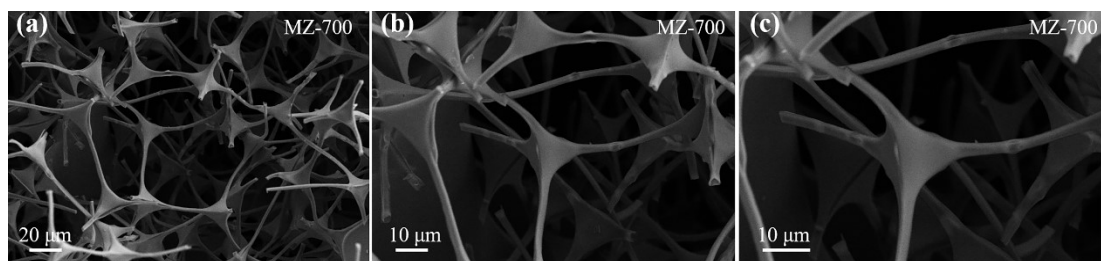

**Fig. S5** SEM images of composite material with ZIF-67 particles attached to melamine foam skeleton after 700 °C heat treatment.

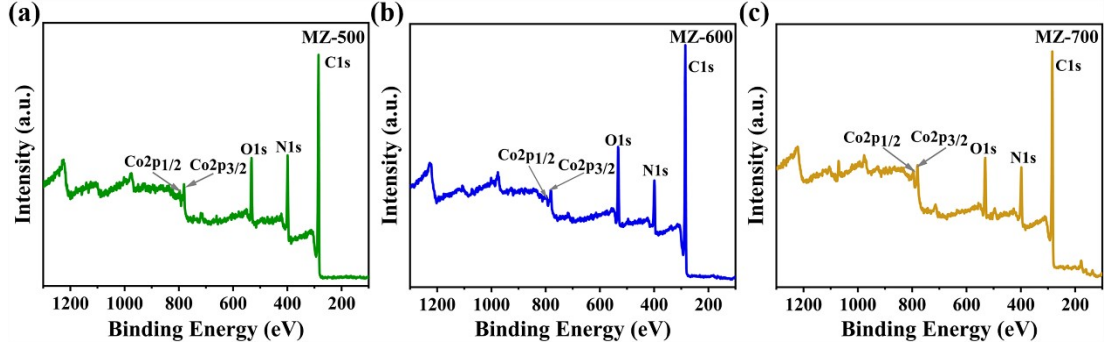

**Fig. S6** XPS spectra of MZ-500/600/700.

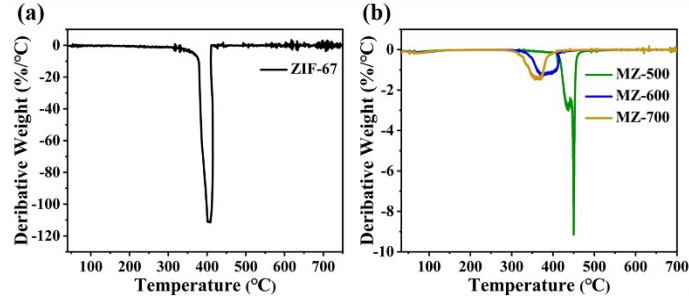

**Fig. S7** DTG diagrams of ZIF-67, MZ-500/600/700.

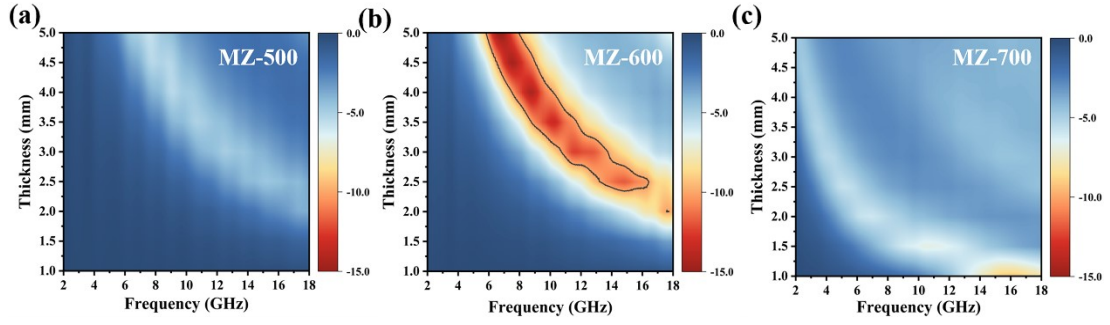

**Fig. S8** 2D plane view of RL calculation for MZ-500/600/700.

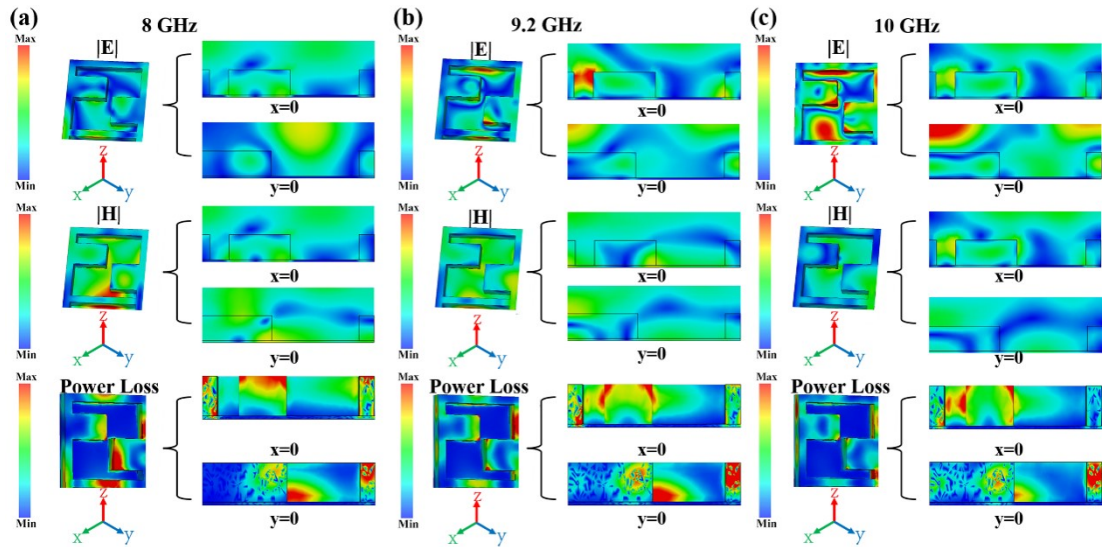

**Fig. S9** Calculated electric and magnetic fields and power loss plot of metamaterials at 8 GHz, 9.2 GHz, 10 GHz.

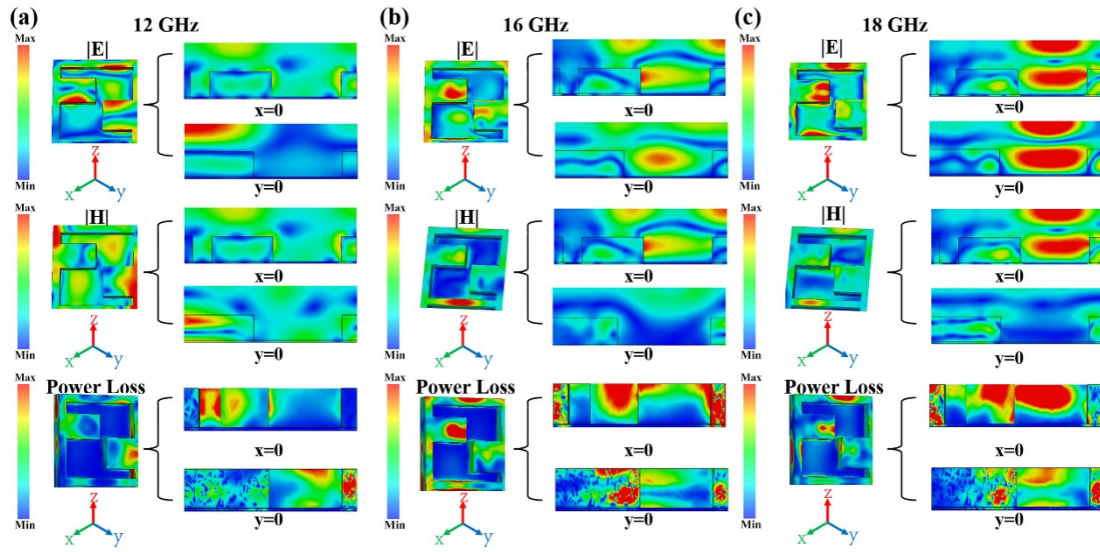

**Fig. S10** Calculated electric and magnetic fields and power loss plot of metamaterials at 12 GHz, 16 GHz, 18 GHz.

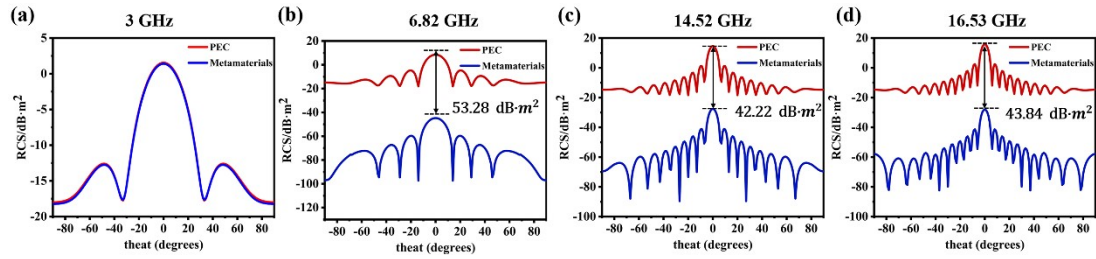

**Fig. S11** Calculated RCS of metamaterials at 3 GHz, 6.82 GHz, 14.52 GHz, and 16.53 GHz.

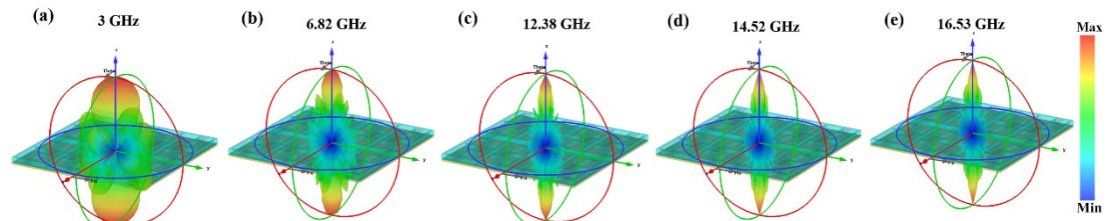

**Fig. S12** Calculated direction diagram of metamaterials at 3 GHz, 6.82 GHz, 14.52 GHz, and 16.53 GHz.
